# Supplementary material for: Closed pore structure engineering from ultra-micropores with the assistance of polypropylene for boosted sodium ion storage
Source: Royal Society of Chemistry journal article supplement (doi:10.1039/d4ta01375a), 2024-01-01
Supplement: d4ta01375a1.pdf [file d4ta01375a1.pdf]

## Supporting Information

### Closed pore structure engineering from ultra-micropore with the assistance of polypropylene for boosted sodium ion storage

*Xue Li, Ning Sun,\* Shaohong Zhang, Razium Ali Soomro, Bin Xu\**

#### Experimental section

##### *Materials preparation*

PVDF-derived porous carbons (PFC) were obtained by the direct carbonization of PVDF (Kynar 761, Arkema Co.) under argon flow at 800 °C for 1 h. For the fabrication of closed pore structure, PFC was firstly mixed with polypropylene (PP) in the ratio of 1:2 by ball milling treatment under solvent-free conditions. The resulting mixture was then subjected to pre-oxidation treatment at 330 °C for 1 h, and the immediate product was denoted as PFC@PP. The closed pore enriched carbon (PFCC@PP) was ultimately obtained after further carbonization at 1300 °C for 2 h under an argon flow. For comparison, PFC was also subjected to further carbonization at 1300 °C for 2 h without the addition of PP, and the resulting sample was designated as PFCC.

##### *Materials characterization*

The morphologies of the samples were obtained using a scanning electron microscope (SEM, SU8000, Hitachi, Japan) and high-resolution transmission electron microscopy (HR-TEM, Tecnai G2 F30, FEI, American). The microcrystalline structure was analyzed using x-ray diffraction (XRD, Ultima IV, Rigaku, Japan) of Cu K $\alpha$  radiation ( $\lambda = 1.54056 \text{ \AA}$ ) and a confocal micro-Raman spectrometer (inVia Reflex, Renishaw, England) with a laser wavelength of 633 nm. The thermal stability was investigated using a simultaneous thermal analyzer (TGA/DSC3+, METTLER, Switzerland). The evolution of functional groups was characterized using a Fourier transform infrared spectrometer (Nicolet 6700, Thermo Fisher, American). XPS

analysis was performed using an X-ray photoelectron spectrometer (ESCALAB 250, THERMO VG, American). The N<sub>2</sub> adsorption-desorption tests were carried out using a Micromeritics ASAP2460 analyzer. The true density of the samples was tested using the AccuPyc II 1340 analyzer with helium as the analysis gas. The Xeuss 2.0 SAXS/WAXS system was used for small angle X-ray scattering (SAXS) test to characterize the closed pores of the samples, with a Cu X-ray source of 30 W ( $\lambda = 1.542$  nm Å).

### ***Electrochemical measurements***

The electrochemical performance of the carbons was tested in CR2025-type coin cells. For the preparation of working electrodes, the uniform slurry containing active material and CMC binder with a mass ratio of 95:5 was spread over the copper foil current collector. After being vacuum dried at 120 °C for 10 h and then cut into circular pieces with a diameter of 10 mm, the electrode was obtained with the average mass loading of active materials controlled about 1 mg cm<sup>-2</sup>. The coin cells were assembled in an argon atmosphere glove box (Mikrouna, H<sub>2</sub>O < 0.1 ppm, O<sub>2</sub> < 0.1 ppm) with sodium foil as counter electrode, 1M NaClO<sub>4</sub> in a mixture of ethylene carbonate (EC) and diethyl carbonate (DEC) (1:1, v/v) as electrolyte, and glass fiber as separator. The galvanostatic charge/discharge test and galvanostatic intermittent titration technique (GITT) were conducted on a LANHE CT001 battery test system (Wuhan, China) with a potential range of 0.001-2.5 V (vs. Na/Na<sup>+</sup>). The cyclic voltammetry (CV) and electrochemical impedance spectroscopy (EIS) tests were performed using a BioLogic VSP electrochemical workstation. The full cell was assembled using PFCC@PP as the anode and O3-NaNi<sub>1/3</sub>Fe<sub>1/3</sub>Mn<sub>1/3</sub>O<sub>2</sub> (Shanghai Zijian Chemical Technology Co.) as the cathode with an N/P ratio of 1.1. The O3-NaNi<sub>1/3</sub>Fe<sub>1/3</sub>Mn<sub>1/3</sub>O<sub>2</sub> cathode was prepared by dispersing the active material, Super P and PVDF with a mass ratio of 8:1:1 in N-methyl-2-pyrrolidone (NMP) solvent, and then coating the slurry onto aluminum foil current collector. The PFCC@PP and O3-NaNi<sub>1/3</sub>Fe<sub>1/3</sub>Mn<sub>1/3</sub>O<sub>2</sub> electrodes were precycled in half-cell at a current rate of 0.1 C before assembling the full cell. The full cell was tested for charging and discharging within a voltage range of 0.5 - 4V.

### ***Computational Methods***

All theoretical calculations were performed via density functional theory (DFT) and the electronic structure of the materials were investigated in the Dmol<sup>3</sup> module of Materials Studio 2020. The PWC exchange correlation function was set to local gradient close to LDA and the dual digital basis DND 4.4 including the d polarization function were adopted to calculate the adsorption energies and differential charge densities. The electronic energy was considered to be self-consistent when the energy change was less than 10<sup>-5</sup> eV. The geometry optimization was considered to be convergent when the energy change was less than 0.01 eV Å<sup>-1</sup>. Horizontal graphene with a length and width of 12.3 × 9.9 Å was established and then compressed to form curved graphene at angles of 36°, 45° and 60° to simulate curved carbon layers in hard carbon, representing open and closed pore structures. The adsorption energy of Na ( $\Delta E_{\text{ads}}$ ) can be described by the following equation:

$$\Delta E_{\text{ads}} = E_{\text{total}} - E_{\text{base}} - E_{\text{Na}}$$

(1)

Where  $E_{\text{total}}$  is the total energy of the material with adsorbed Na atoms, and  $E_{\text{base}}$  and  $E_{\text{Na}}$  are the energy of the clean substrate and Na, respectively. The PWC exchange correlation function with local gradient close to LDA and the dual digital basis DND including the d polarization function were adopted to calculate the adsorption energies and differential charge densities. The isosurface values for the charge-difference figures is 0.005 Å<sup>-3</sup>.

### ***Models for SAXS data analysis***

Small angle X-ray scattering (SAXS) technique stands as an important instrument for characterizing the microstructure of nanoporous materials. Porod's law is a fundamental formula in SAXS theory, which is mainly used to describe the asymptotic relationship between the scattering intensity and the scattering vector function <sup>[1]</sup>. For different samples, there are three different scattering characteristics of Porod curves, which are no deviation, negative deviation and positive deviation <sup>[2]</sup>. According to the test results, the materials prepared in this study belong to the positive deviation, and there was electron density micro-fluctuation in the range of 1-5 nm<sup>-1</sup>. The expression

of Porod's law is:

$$\ln[q^4 I(q)] = \ln K + bq^2 \quad (2)$$

Where  $q$  is the scattering vector,  $q = 4\pi \sin\theta / \lambda$ ,  $2\theta$  is the scattering angle,  $\lambda$  is the wavelength of the incident X-rays,  $I(q)$  is the scattering intensity,  $K$  is the Porod constant, and  $b$  is a constant related to the size of the regions with micro-fluctuations of electron density.

The specific surface area of the material was calculated from Porod's law as shown in equation:

$$S = \frac{\pi\phi(1-\phi)K}{Q\rho_p} \quad (3)$$

Where  $K$  is Porod constant,  $\phi$  is the volume fraction of the dispersed phase, and for porous systems,  $\phi$  is the porosity, which is usually derived from the absolute intensity of the density of the sample, and  $Q$  is the invariant, which is given by the formula:

$$Q = \int_0^{\infty} q^2 I(q) dq \quad (4)$$

For the calculation of  $Q$ , it is necessary to consider 0 to  $\infty$ , but in the practical measurement, the instrument is limited in its ability to measure extremely small or large  $q$  values and thus, can only be within a certain range. The test range for  $q$  was defined as  $[q_1, q_2]$ . When  $q$  is less than  $q_1$ , extrapolation of the linear part of the low  $q$  region according to Guinier approximation [3]. When  $q$  was greater than  $q_2$ , the scattering curve obeys the  $q^{-4}$  rule in that range according to Porod's law [4].

$$\phi = 1 - \frac{\rho_p}{\rho_s} \quad (5)$$

$$\rho_s = \rho_g \times \frac{d_{002 \text{ graphite}}}{d_{002 \text{ sample}}} \quad (6)$$

The porosity of the material is calculated by the formulas [5], where  $\rho_p$  is the particle density and  $\rho_s$  is the structural density of the materials. For the calculation of  $\rho_s$ , where  $\rho_g$  is the theoretical density of graphite (2.26 g cm<sup>-3</sup>),  $d_{002 \text{ graphite}}$  and  $d_{002 \text{ sample}}$  are the average interlayer spacing between graphite and sample. The value of  $d_{002 \text{ sample}}$  was obtained by X-ray diffraction (XRD) pattern.

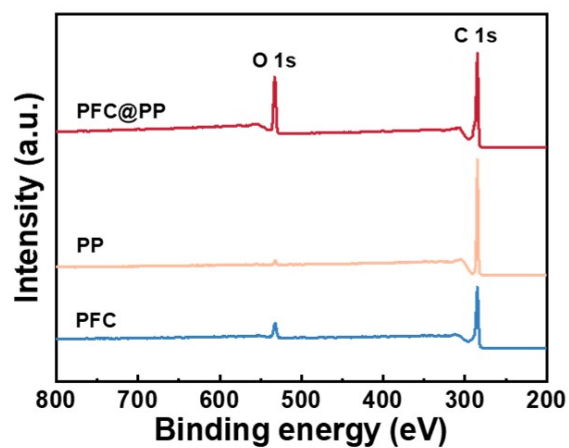

Fig. S1. XPS survey spectra of PFC, PP and PFC@PP.

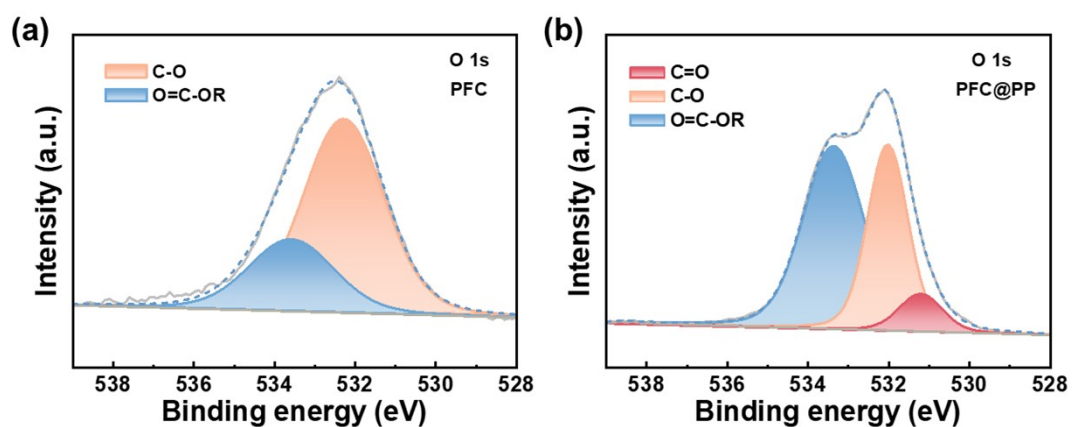

Fig. S2. High-resolution O 1s XPS spectra of (a) PFC and (b) PFC@PP.

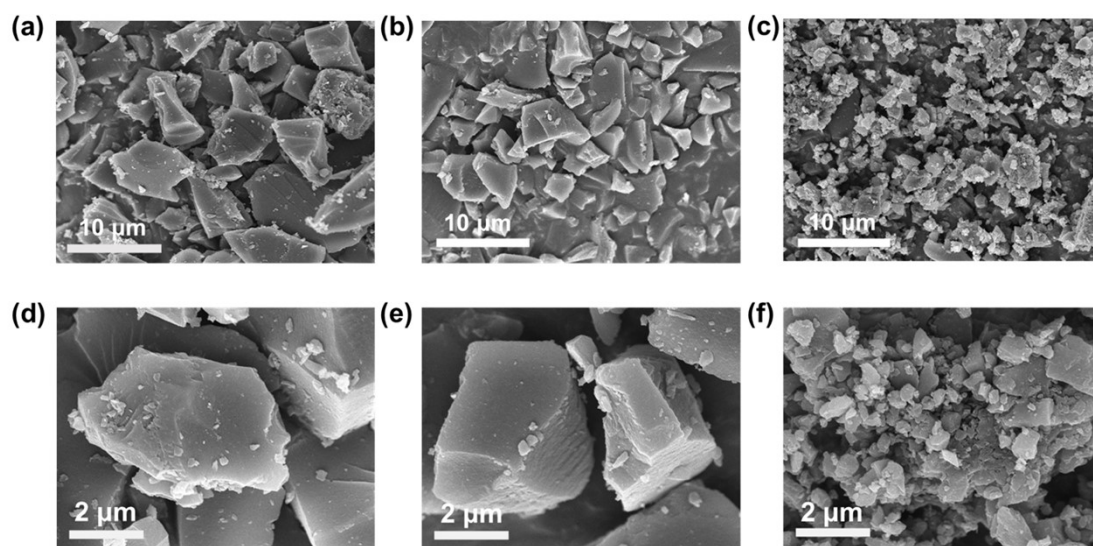

**Fig. S3.** SEM images of (a, d) PFC, (b, e) PFCC and (c, f) PFCC@PP.

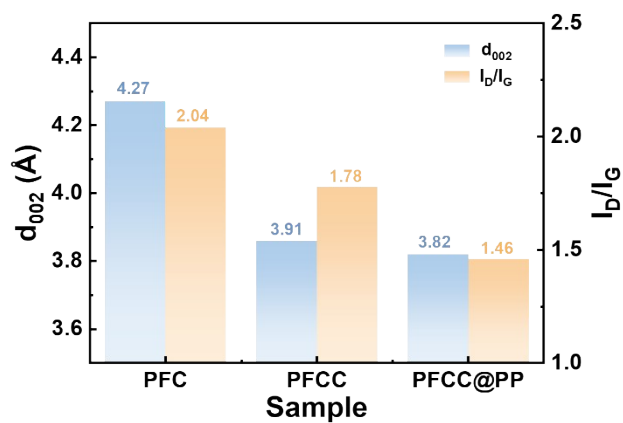

**Fig. S4.** Bar-graph depicting the variation of  $d_{002}$  and  $I_D/I_G$  of PFC, PFCC and

PFCC@PP.

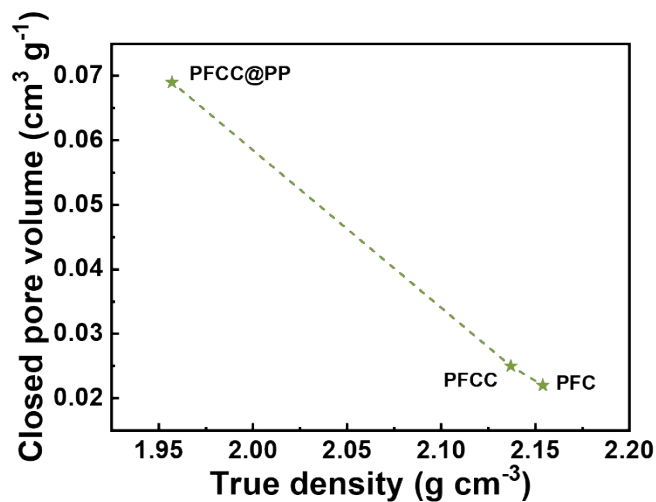

Fig. S5. True density of PFC, PFCC and PFCC@PP.

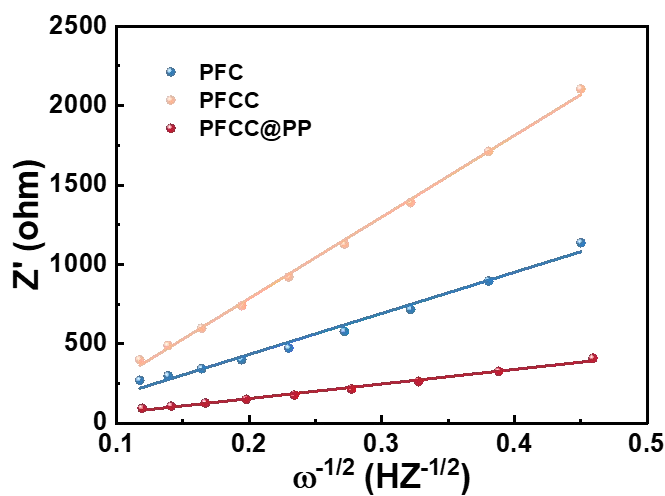

Fig. S6. Warburg profiles of PFC, PFCC and PFCC@PP.

$$D_{Na^+} = \frac{R^2 T^2}{2A^2 n^2 F^4 C^2 \sigma^2} \quad (7)$$

$$Z' = R_s + R_{ct} + \sigma \omega^{-1/2} \quad (8)$$

Where R is the gas constant ( $8.314 \text{ J mol}^{-1} \text{ K}^{-1}$ ), T is the absolute temperature (K), A is the electrode surface area, n is the number of electrons per molecule during the redox reaction, F is the Faraday constant ( $96500 \text{ C mol}^{-1}$ ), C is the  $\text{Na}^+$  concentration, and  $\sigma$

is the Warburg factor, which can be determined from a linear fit of  $Z'$  and  $\omega^{-1/2}$  in the low-frequency region.

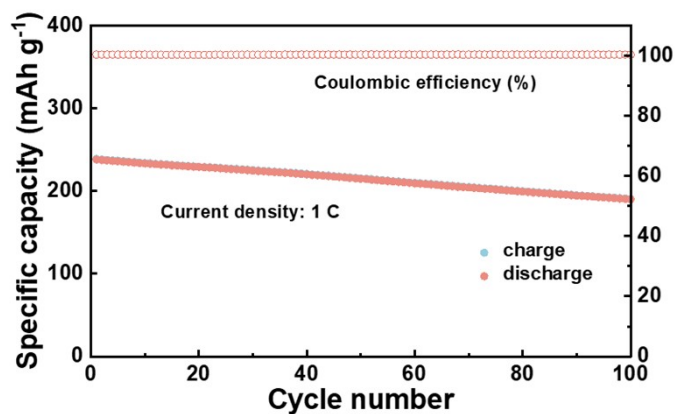

Fig. S7. Cycling performance at 1 C of the sodium-ion full cell.

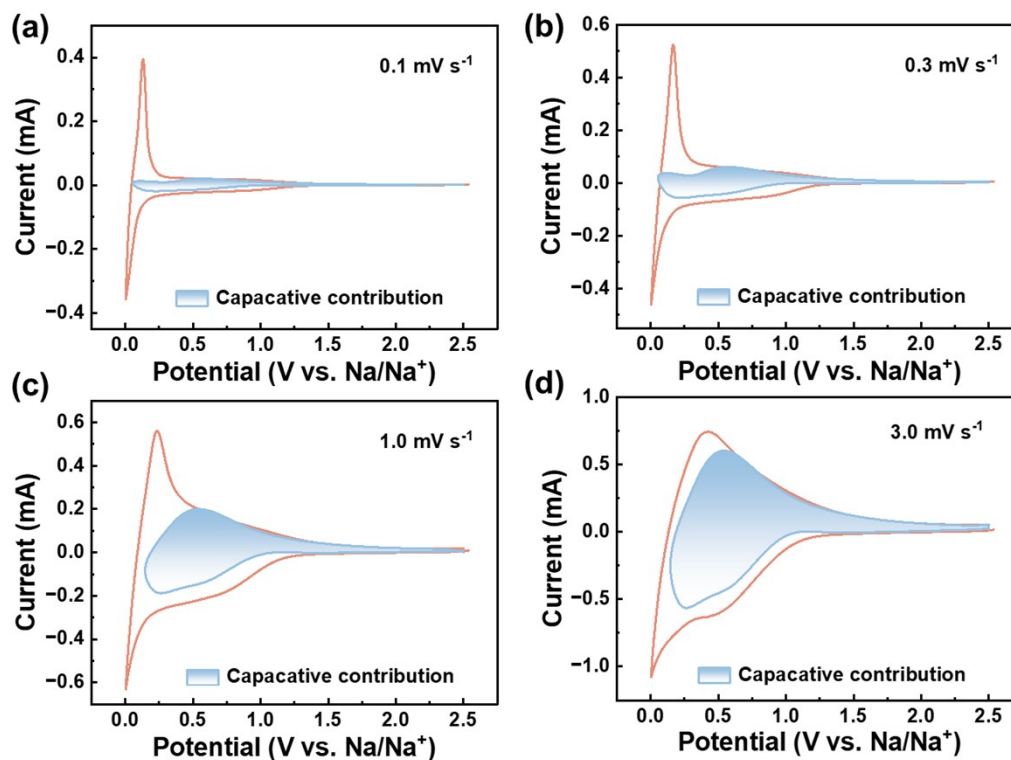

Fig. S8. CV curve of PFCC@PP electrode with calculated capacitive contribution at



(a)  $0.1 \text{ mV s}^{-1}$ , (b)  $0.3 \text{ mV s}^{-1}$ , (c)  $1.0 \text{ mV s}^{-1}$  and (d)  $3.0 \text{ mV s}^{-1}$ .

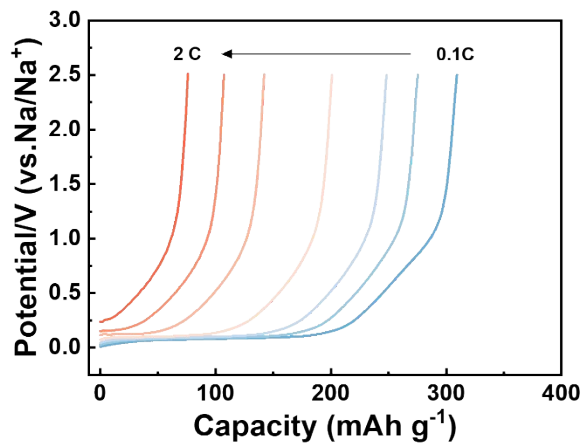

**Fig. S9.** Galvanostatic charge curves of PFCC@PP at different current rates.

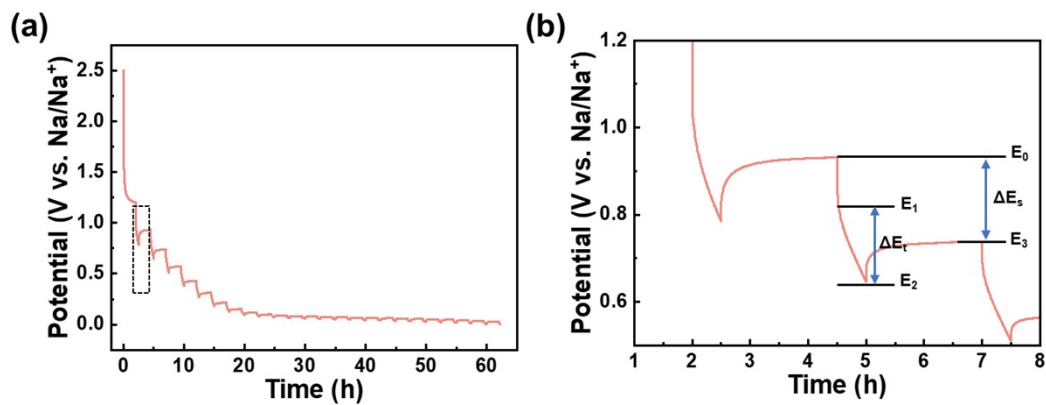

**Fig. S10.** (a) GITT plot of PFCC@PP and its (b) enlarged regions during discharge:  $\Delta E_t$  is the voltage change of constant current discharging from  $E_1$ - $E_2$ , and  $\Delta E_s$  is the voltage change caused by the pulse from  $E_0$ - $E_3$ .

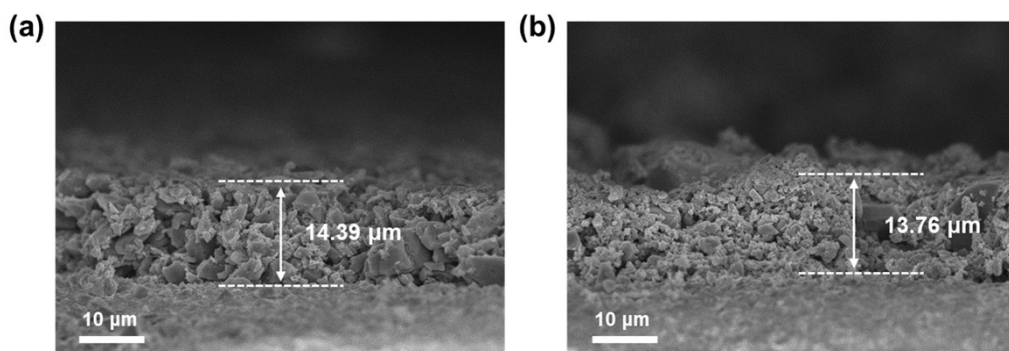

**Fig. S11.** The cross-sectional SEM images of (a) PFC and (b) PFCC@PP electrodes.

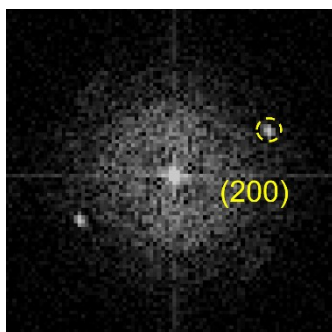

**Fig. S12.** The fast Fourier transform (FFT) of PFCC@PP.

**Table S1** Element content from XPS survey of carbon samples.

| Samples | C (at%) | O (at%) |
|---------|---------|---------|
| PFC     | 89.2    | 10.8    |
| PP      | 98.2    | 1.8     |
| PFC@PP  | 79.0    | 21.0    |

**Table S2** The structural characterization of the carbon samples.

| Samples | $d_{002}$ (nm) | $I_D/I_G$ | $I_{D''}/I_G$ | $I_T/I_G$ |
|---------|----------------|-----------|---------------|-----------|
| PFC     | 0.427          | 2.04      | 1.41          | 0.82      |
| PFCC    | 0.391          | 1.78      | 1.01          | 0.63      |
| PFCC@PP | 0.382          | 1.46      | 0.78          | 0.55      |

**Table S3** Pore structure parameter of PFC, PFCC and PFCC@PP.

| Sample  | $S_{BET}$<br>( $m^2 g^{-1}$ ) | $V_t$<br>( $cm^3 g^{-1}$ ) | $S_{SAXS}$<br>( $m^2 g^{-1}$ ) | $S_{Closed\ pore}$<br>( $m^2 g^{-1}$ ) | $\rho_{true}$<br>( $g\ cm^{-3}$ ) | $V_{Closed\ pore}$<br>( $cm^3 g^{-1}$ ) |
|---------|-------------------------------|----------------------------|--------------------------------|----------------------------------------|-----------------------------------|-----------------------------------------|
| PFC     | 962.3                         | 0.409                      | 972                            | 9.7                                    | 2.154                             | 0.022                                   |
| PFCC    | 949.6                         | 0.402                      | 1306                           | 356.4                                  | 2.137                             | 0.025                                   |
| PFCC@PP | 5.8                           | 0.048                      | 1100                           | 1094.2                                 | 1.957                             | 0.069                                   |

**Table S4** Na-storage performance comparison of PFCC@PP with the reported carbons in the literatures.

|    | <b>Carbon material</b> | <b>Reversible capacity (mAh g<sup>-1</sup>)</b> | <b>ICE (%)</b> | <b>Ref.</b>      |
|----|------------------------|-------------------------------------------------|----------------|------------------|
| 1  | PO-SC-S                | 250                                             | 80             | [6]              |
| 2  | RH1600                 | 276                                             | 53.1           | [7]              |
| 3  | FP-MP 5:2 1000         | 282                                             | 80             | [8]              |
| 4  | CUB-600                | 236.3                                           | 59.9           | [9]              |
| 5  | MCH                    | 431                                             | 57             | [10]             |
| 6  | 1400HCMNT              | 290                                             | 80             | [11]             |
| 7  | ChT-1100               | 326                                             | 71.2           | [12]             |
| 8  | POP3-1200              | 276.8                                           | 67.5           | [13]             |
| 9  | N-CNS-1050             | 304.7                                           | 79.5           | [14]             |
| 10 | N-AC-1200              | 282                                             | /              | [15]             |
| 11 | WFC-1800               | 241.7                                           | 80.5           | [16]             |
| 12 | MoC@MCNs               | 289                                             | 81             | [17]             |
| 13 | HC-325-12              | 300.8                                           | 82.8           | [18]             |
| 14 | HHC                    | 279.3                                           | 70.2           | [19]             |
| 15 | MPC-1100               | 318                                             | 71.2           | [20]             |
|    | PFCC@PP                | 309.3                                           | 87.8           | <b>This work</b> |

**Table S5.** Fitted kinetic parameters of carbon electrode obtained by the equivalent electric circuit.

| <b>Samples</b> | <b><math>R_{\Omega}</math> (<math>\Omega</math>)</b> | <b><math>R_{ct}</math> (<math>\Omega</math>)</b> | <b><math>\sigma</math></b> | <b><math>D_{Na^+}</math> (<math>cm^2 s^{-1}</math>)</b> |
|----------------|------------------------------------------------------|--------------------------------------------------|----------------------------|---------------------------------------------------------|
| PFC            | 3.24                                                 | 218.4                                            | 2679                       | $2.24 \times 10^{-10}$                                  |
| PFCC           | 4.69                                                 | 200.4                                            | 4983                       | $6.48 \times 10^{-11}$                                  |
| PFCC@PP        | 3.16                                                 | 66.7                                             | 877                        | $2.09 \times 10^{-9}$                                   |

## References:

1. D. Saurel; J. Segalini; M. Jauregui; A. Pendashteh; B. Daffos; P. Simon; M. Casas-Cabanas, *Energy Storage Mater.* 2019, **21**, 162-173.
2. Z.-H. Li, *Chin. Phys. C* 2013, **37**, 108002.
3. L. C. Li Denghua, Yang Yu, Wang Li'na, Cui Dongxia, Liu Zhe, Guo Yingying, *Materials Reports* 2021, **35**, 07077-07086.
4. L. Peng; B. Chen; Y. Zhao, *Constr. Build. Mater.* 2020, **262**, 120863.
5. L. D. Cen Wei, Zhu Xiaoheng, Mao Bingquan, *Petrochemical Technology*, 2012, **41**, 97-102.
6. F. Xie; Y. Niu; Q. Zhang; Z. Guo; Z. Hu; Q. Zhou; Z. Xu; Y. Li; R. Yan; Y. Lu; M. M. Titirici; Y. S. Hu, *Angew. Chem. Int. Ed.*, 2022, **61**, e202116394.
7. M. K. Rybarczyk; Y. Li; M. Qiao; Y.-S. Hu; M.-M. Titirici; M. Lieder, *J. Energy Chem.*, 2019, **29**, 17-22.
8. F. Xie; Z. Xu; A. C. S. Jensen; H. Au; Y. Lu; V. Araullo-Peters; A. J. Drew; Y. S. Hu; M. M. Titirici, *Adv. Funct. Mater.*, 2019, **29**, 1901072.
9. Y. Li; M. Kong; J. Hu; J. Zhou, *Adv. Energy Mater.*, 2020, **10**, 2000400.
10. L. Peng; H. Peng; L. Xu; B. Wang; K. Lan; T. Zhao; R. Che; W. Li; D. Zhao, *J. Am. Chem. Soc.*, 2022, **144**, 15754-15763.
11. Z.-E. Yu; Y. Lyu; Y. Wang; S. Xu; H. Cheng; X. Mu; J. Chu; R. Chen; Y. Liu; B. Guo, *Chem. Commun.*, 2020, **56**, 778-781.
12. S. Zhou; Z. Tang; Z. Pan; Y. Huang; L. Zhao; X. Zhang; D. Sun; Y. Tang; A. S. Dhmees; H. Wang, *SusMat*, 2022, **2**, 357-367.
13. L. Ji; Y. Zhao; L. Cao; Y. Li; C. Ma; X. Qi; Z. Shao, *J. Mater. Chem. A*, 2023, **11**, 26727-26741.
14. Y. Zhao; Z. Hu; C. Fan; P. Gao; R. Zhang; Z. Liu; J. Liu; J. Liu, *Small*, 2023, **19**, 2303296.
15. R. Li; B. Yang; A. Hu; B. Zhou; M. Liu; L. Yang; Z. Yan; Y. Fan; Y. Pan; J. Chen; T. Li; K. Li; J. Liu; J. Long, *Carbon*, 2023, **215**, 118489.
16. H. Wang; L. Shi; Z. Yang; J. Liu; Y. Xu; M. Song; J. Jiang; Q. Zhuang; Y. Chen;

- Z. Ju, *Mater. Today Sustainability*, 2023, **24**, 100578.
17. Y. Liu; Y. Wan; J. Y. Zhang; X. Zhang; C. T. Hung; Z. Lv; W. Hua; Y. Wang; D. Chao; W. Li, *Small*, 2023, **19**, 2301203.
  18. R. Xu; Z. Yi; M. Song; J. Chen; X. Wei; F. Su; L. Dai; G. Sun; F. Yang; L. Xie; C.-M. Chen, *Carbon*, 2023, **206**, 94-104.
  19. Y. Qiu; G. Jiang; Y. Su; X. Zhang; Y. Du; X. Xu; Q. Ye; J. Zhang; M. Ban; F. Xu; H. Wang, *Carbon Energy*, 2024, e479.
  20. J. L. Xia; D. Yan; L. P. Guo; X. L. Dong; W. C. Li; A. H. Lu, *Adv. Mater.*, 2020, **32**, 2000447.
